# Supplementary material for: One-pot catalyst-free synthesis of down- and upconversion fluorescent oligopyrazolines from diazoacetates and maleic anhydride
Source: Royal Society of Chemistry journal article supplement (doi:10.1039/c5py00336a), 2015-01-01
Supplement: c5py00336a1.pdf [file c5py00336a1.pdf]

# One-Pot Catalyst-Free Synthesis of Down- and Upconversion Fluorescent Oligopyrazolines from Diazoacetates and Maleic Anhydride

Xiangxiang Jia, Yan Li, Jinlong Wu, Cheng Chen, Lijian Liu\*

Key Laboratory of Biomedical Polymers, Ministry of Education, College of Chemistry and Molecular  
Sciences, Wuhan University, Wuhan, 430072, China.

Correspondence to: Lijian Liu (E-mail: liulj@whu.edu.cn)

## Supporting Information

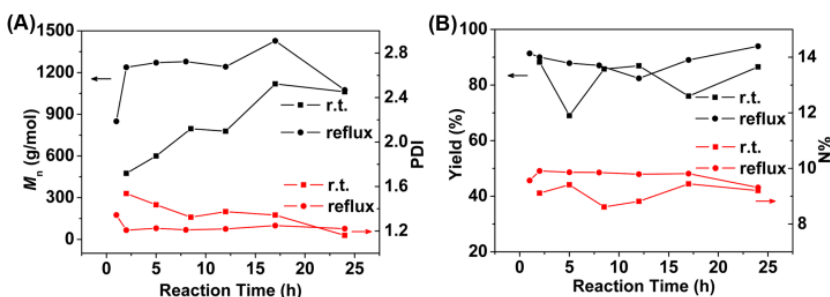

**Figure S1.** The polymerization of MA and EDA at different reaction time in CHCl<sub>3</sub>. (A) black:  $M_n$ ; red: PDI. (B) black: yield; red: N%.

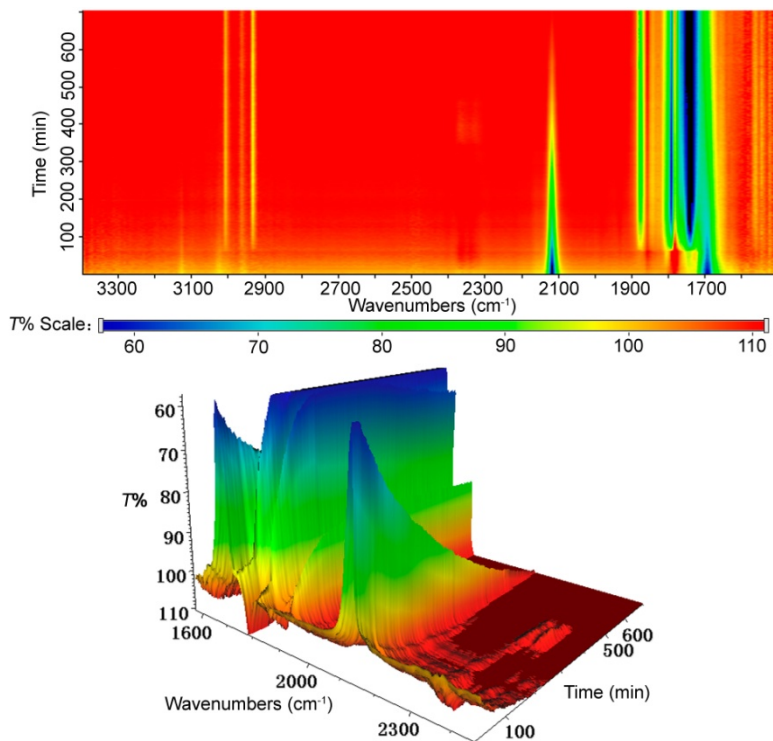

**Figure S2.** The on-line FT-IR spectra of MA polymerized with MDA.

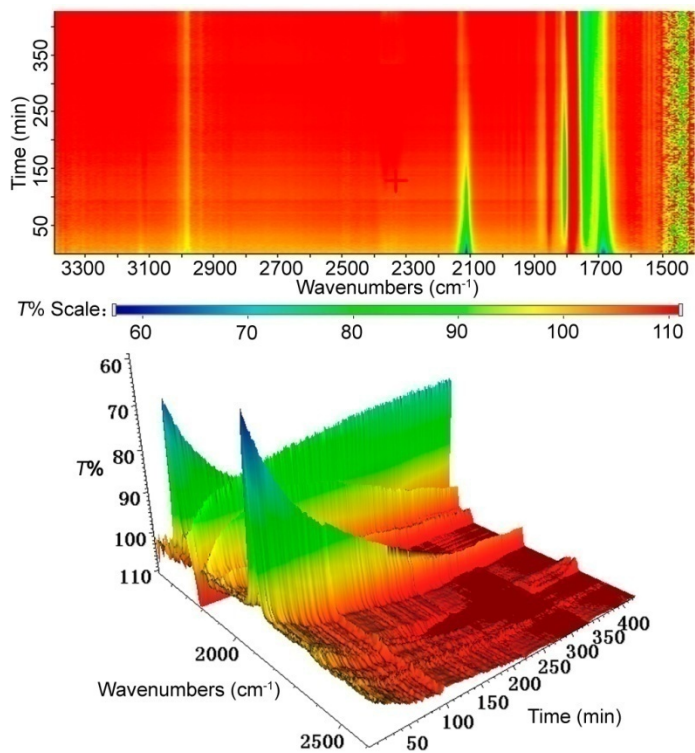

**Figure S3.** The on-line FT-IR spectra of MA polymerized with *t*-BDA.

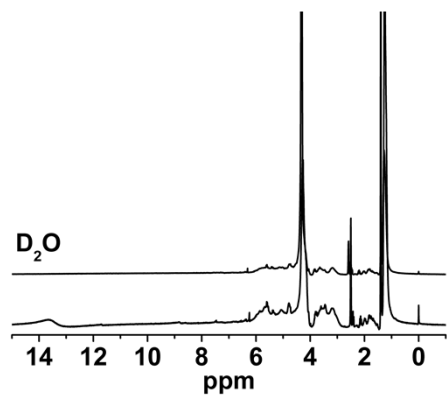

**Figure S4.** The <sup>1</sup>H NMR spectra of the oligomer of [1a]:[2a]=1:1 with the addition of deuterioxide.

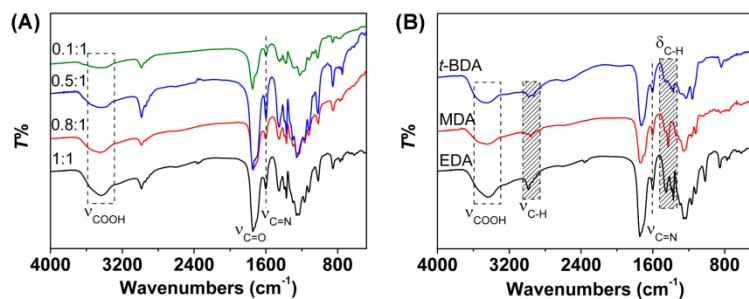

**Figure S5.** The FT-IR spectra of the oligomers. (A) The oligomers with different feed ratios of [1a]:[2a]; (B) The oligomers derived from MA and 2a-c with the feed ratio of [1a]:[2]=1:1.

Here, in Figure S5A, the ratio of absorption at 3434 cm<sup>-1</sup> to that at 1744 cm<sup>-1</sup>, defined as  $A_{3434}/A_{1744}$  ( $A_{3434}$ : the peak area of 3708-3283 cm<sup>-1</sup>;  $A_{1744}$ : the peak area of 1631-1869 cm<sup>-1</sup>), could be used to express the change of COOH group in the oligomer with different feed ratios in some way. The values of  $A_{3434}/A_{1744}$  for the reactions with the ratio of 1-0.1 are 0.66, 0.72, 0.35 and 0.33, respectively.

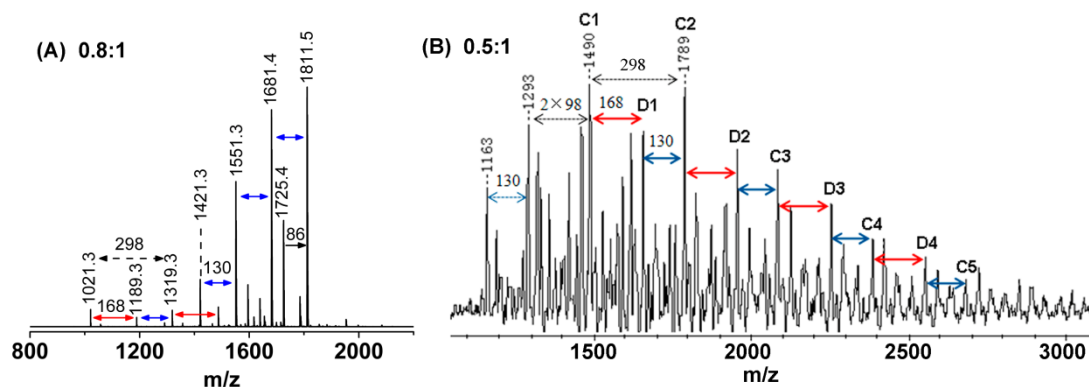

**Figure S6.** The MALDI-TOF-MS spectra of oligomers with [1a]:[2a]=0.8:1 (A) and 0.5:1 (B).

The spectrum analysis for Figure S6A is shown as follows:

- 298+168×6+114+1 {[-U1-(U2)<sub>6</sub>-U5]-H<sup>+</sup>} for  $m/z=1421.3$ ;
- 298×2+168×5+114+1 {[-(U1)<sub>2</sub>-(U2)<sub>5</sub>-U5]-H<sup>+</sup>} for  $m/z=1551.3$ ;
- 298×3+168×4+114+1 {[-(U1)<sub>3</sub>-(U2)<sub>4</sub>-U5]-H<sup>+</sup>} for  $m/z=1681.4$ ;
- 298×4+168×3+114+1 {[-(U1)<sub>4</sub>-(U2)<sub>3</sub>-U5]-H<sup>+</sup>} for  $m/z=1811.5$ .

The spectrum analysis for Figure S6B is shown as follows:

- series C1-C5 are made up of U1+H<sup>+</sup>,  $m/z=298n+1$ ,  $n=5-9$ ;
- series D1-D4 are made up of U1+U2+H<sup>+</sup>,  $m/z=298n+168+1$ ,  $n=5-8$ .

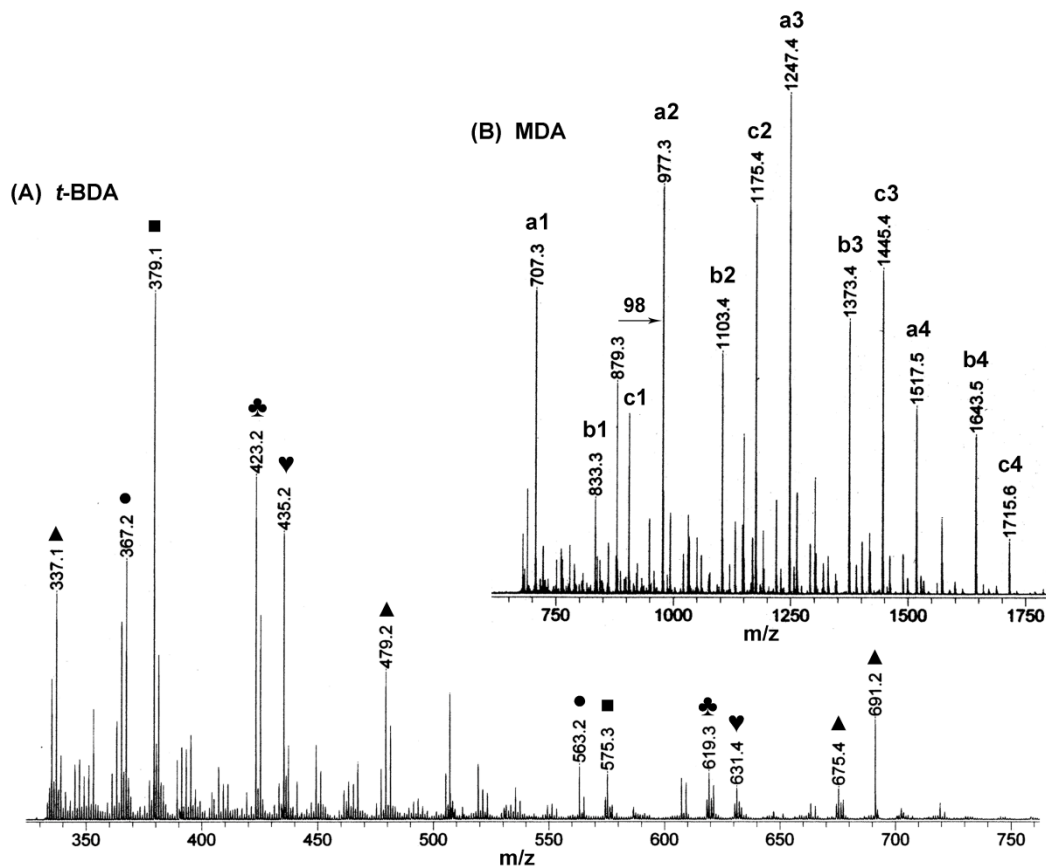

**Figure S7.** The MALDI-TOF-MS spectra of oligomers derived from *t*-BDA (A) and MDA (B).

For monomer *t*-BDA,  $M_{U1}=354$ ,  $M_{U2}=196$ ,  $M_{U4}=114$ ,  $M_{U5}=142$ . Here  $M$  represents molecular weight. As shown in Figure S7A, series 337.1+142 (for  $m/z=479.2$ ), 337.1+142+196 (for  $m/z=675.4$ ) and 337.1+354 (for  $m/z=691.2$ ) are recorded, marked as ▲. Other series (marked as ●, ■, ♣, and ♥) all possess an  $m/z$  difference of 196 ( $U_2$ ). The formula for  $m/z=379.1$  is  $354+2+23$  (i.e.  $[H-U_1-H]Na^+$ ).

For monomer MDA,  $M_{U1}=270$ ,  $M_{U2}=154$ ,  $M_{U4}=72$ ,  $M_{U5}=100$ . Here  $M$  represents molecular weight. The formulae for the calculation of measured  $m/z$  are expressed as follows:

series a1-a4 are made up of  $U_1+U_4+Na^+$ ,  $m/z=270n+72\times 2+23$ ,  $n=2-5$ ;

series b1-b4 are made up of  $U_1+Na^+$ ,  $m/z=270n+23$ ,  $n=3-6$ ;

series c1-c4 are made up of  $U_1+U_4+Na^+$ ,  $m/z=270n+72+23$ ,  $n=3-6$ .

Here, 23 is the  $m/z$  value of  $Na^+$ . The differential value between series b and c is 72 ( $U_4$ ). Another deviation between 879.3 and 977.3 is 98, in agreement with the unit  $U_3$ .

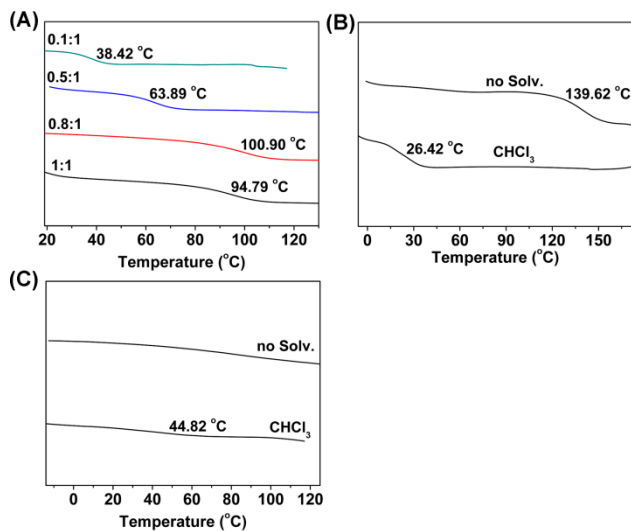

**Figure S8.** The DSC curves of the obtained oligomers. (A) Oligomers from MA and EDA without any solvent with feed ratio of 1-0.1; (B) Oligomers from MA and MDA at two different conditions: in CHCl<sub>3</sub> at room temperature and without the addition of solvents; (C) Oligomers from MA and *t*-BDA at two different conditions: in CHCl<sub>3</sub> at room temperature and without the addition of solvents.

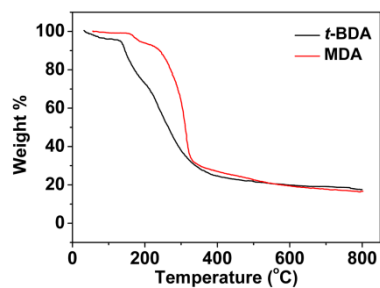

**Figure S9.** The TG curves of the oligomers obtained from MDA and *t*-BDA without solvents.

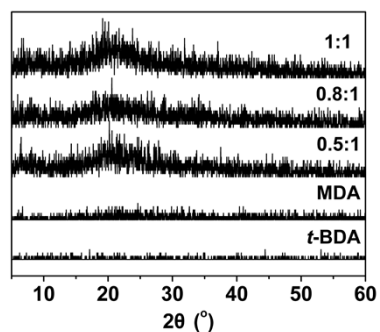

**Figure S10.** The XRD patterns of the oligomers.

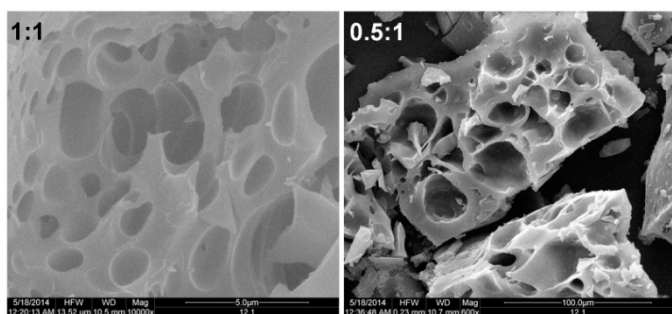

**Figure S11.** The SEM images of the oligomers with feed ratio of  $[1a]:[2a]=1:1$  and  $0.5:1$ .

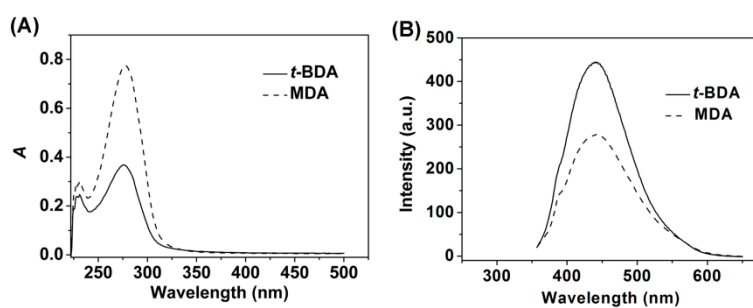

**Figure S12.** UV-Vis (A) and fluorescent spectra (B) of oligomers from MDA and *t*-BDA.

**Table S1.** The quantum yield (QY) of the oligomers.

| Oligomer | $[1a]:[2a]=1:1$ | $[1a]:[2a]=0.8:1$ | $[1a]:[2a]=0.5:1$ | $[1a]:[2a]=0.1:1$ | $[1a]:[2b]=1:1$ | $[1a]:[2c]=1:1$ |
|----------|-----------------|-------------------|-------------------|-------------------|-----------------|-----------------|
| QY (%)   | 19              | 15                | 14                | 12                | 12              | 17              |

The QY is measured with quinine sulfate as the standard (0.1 M  $H_2SO_4$  at 22 °C, QY=58% with excitation at 350 nm), using the following formula:

$$Q = Q_R \frac{I OD_R n^2}{I_R OD n_R^2}$$

where  $Q$ ,  $I$ ,  $OD$  and  $n$  are the quantum yield, the integrated fluorescence intensity, the optical density and the refractive index, respectively. The subscript R represents the standard fluorophore.

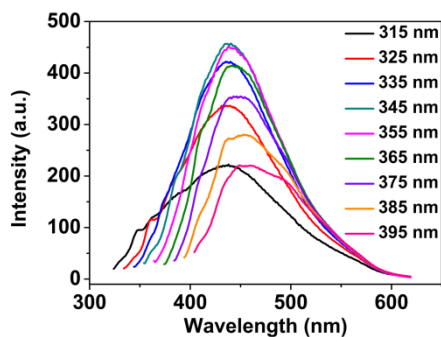

**Figure S13.** Fluorescent spectra of the oligomer from EDA with the ratio of 1:1 at different excitation wavelengths.

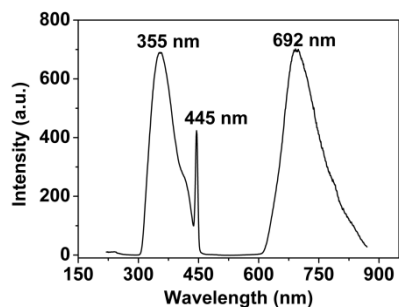

**Figure S14.** The excitation spectrum with the emission at 445 nm.

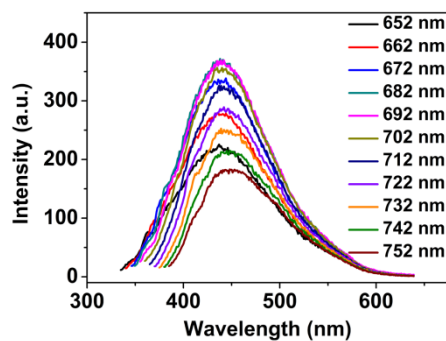

**Figure S15.** Upconversion fluorescent spectra of the oligomer from EDA with the ratio of 1:1 at different excitation wavelengths.

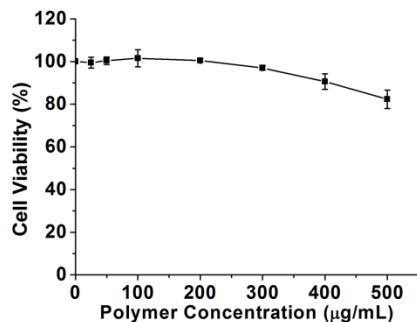

**Figure S16.** Cytotoxicity of the oligomer from EDA with the ratio of 1:1 in HeLa cells.

**Cytotoxicity Assay.** HeLa cells in the medium of DMEM containing 10% FBS (1 mL) were seeded directly in a 24-well plate ( $5 \times 10^4$  cells per well) and then incubated at 37 °C for 24 h. After the cells were incubated at 37 °C for another 24 h with the addition of the sample to be detected, 1 mL of DMEM containing 10% FBS and MTT (60 µL, 5 mg/mL) were added into each well with the following incubation at 37 °C for 4 h. After that, the supernatant was removed and DMSO (850 µL) was added in. The absorbance of the solution at 570 nm was measured with a microplate reader (Bio-Rad 550) to obtain the OD value. The relative cell viability was calculated as followed:

$$\text{Relative cell viability} = (\text{OD}_{(\text{sample})} / \text{OD}_{(\text{control})}) \times 100\%$$

where  $\text{OD}_{(\text{sample})}$  was obtained from the cells in the presence of the oligomer and  $\text{OD}_{(\text{control})}$  was obtained from the cells without the addition of oligomer. The data was given as mean  $\pm$  standard deviation (SD) based on triplicate independent experiments.
